# Supplementary material
Source: publisher site journal article supplement (https://www.dovepress.com/article/314132)
Supplement: Supplementary file 1 [file get_supplementary_file.php]

**Nutritional interventions on functional status for critically ill patients: An integrative review**

**SEARCH STRATEGY**

**Database:** PubMed, EMBASE, Web of Science, CINAHL Plus with Full Text, Cochrane Library.

**Limit:** human (≥18); language: English; time: January 2010-September 2020.

**P** (population): ICU patients

("intensive care units"[MeSH Terms] OR (Intensive Care[All Fields] AND Unit*[ All Fields]) OR ("critical illness"[MeSH Terms] OR ((critical[All Fields] AND illness*[ All Fields]) OR Critically Ill[All Fields]) OR ("critical care"[MeSH Terms] OR Intensive Care[All Fields] OR Surgical Intensive Care[All Fields])

**I** (intervention): nutritional interventions

("nutrition therapy"[MeSH Terms] OR Medical Nutrition Therapy[All Fields]) OR (“Diet Therapy"[MeSH Terms] OR (Diet*[All Fields] AND Modification*[ All Fields])) OR ("nutritional support"[MeSH Terms] OR Artificial Feeding[All Fields]) OR ("enteral nutrition"[MeSH Terms] OR Enteral Feeding[All Fields] OR Force Feeding[All Fields] OR Tube Feeding[All Fields] OR (Gastric Feeding[All Fields] AND Tube*[All Fields])) OR ("Parenteral Nutrition"[MeSH Terms] OR (Parenteral[All Fields] AND Feeding*[ All Fields])OR (Intravenous[All Fields] AND Feeding*[ All Fields]))

**O** (outcome): functional status/muscle weakness

(Functional[All Fields] AND Status[All Fields]) OR (functional[All Fields] AND performance*[All Fields]) OR ("physical functional performance"[MeSH Terms] OR Physical Functional Performance[All Fields]) OR (physical[All Fields] AND performance*[All Fields]) OR ("physical examination"[MeSH Terms] OR (Physical[All Fields] AND Functional[All Fields])) OR (muscle[All Fields] AND weakness*[All Fields]) OR (muscular[All Fields] AND weakness*[All Fields]) OR ("polyneuropathies"[MeSH Terms] OR (Motor[All Fields] AND Polyneuropath*[All Fields]) OR (Acquired[All Fields] AND Polyneuropath*[All Fields]) OR (Critical Illness[All Fields] AND Polyneuropath*[All Fields])) OR ("muscle weakness"[MeSH Terms] OR (Muscle[All Fields] AND Weakness*[All Fields]) OR (Muscular[All Fields] AND Weakness*[All Fields])) OR ("Muscular Diseases"[MeSH Terms] OR Muscular Disease[All Fields] OR Myopath*[All Fields] OR (Muscle[All Fields] AND Disorder*[All Fields]) OR (Myopathic[All Fields] AND Condition*[All Fields])) OR ("Paresis"[MeSH Terms] OR Pareses[All Fields] OR (Muscular[All Fields] AND Pares*[All Fields]) OR (Muscle[All Fields] AND Pares*[All Fields])) OR (Acquired Weakness[All Fields] OR Acquired Debilitation[All Fields] OR ICU-AW[All Fields] OR Polyneuropath*[All Fields] OR Neuromuscular[All Fields] OR Quadriplegia[All Fields]) OR (CIM[Title/Abstract] OR CIP[Title/Abstract] OR CIPM[Title/Abstract] OR CIPNM[Title/Abstract] OR ICUAW[Title/Abstract] OR ICUAP[Title/Abstract] OR CINMA[Title/Abstract])

PUBMED SR (4 September 2020)

1. (("intensive care units"[MeSH Terms] OR (Intensive Care[All Fields] AND Unit*[ All Fields]) OR ("critical illness"[MeSH Terms] OR (critical[All Fields] AND illness*[ All Fields]) OR Critically Ill[All Fields])) OR ("critical care"[MeSH Terms] OR Intensive Care[All Fields] OR Surgical Intensive Care[All Fields])

2. (((("nutrition therapy"[MeSH Terms] OR Medical Nutrition Therapy[All Fields]) OR ("Diet Therapy"[MeSH Terms] OR (Diet*[ All Fields] AND Modification*[ All Fields])) OR ("nutritional support"[MeSH Terms] OR Artificial Feeding[All Fields])) OR ("enteral nutrition"[MeSH Terms] OR Enteral Feeding[All Fields] OR Force Feeding[All Fields] OR Tube Feeding[All Fields] OR (Gastric Feeding[All Fields] AND Tube*[All Fields])) OR ("Parenteral Nutrition"[MeSH Terms] OR (Parenteral[All Fields] AND Feeding*[ All Fields])OR (Intravenous[All Fields] AND Feeding*[ All Fields])

3. ((((((((((((((((Functional[All Fields] AND Status[All Fields]) OR (functional[All Fields] AND performance*[All Fields])) OR ("physical functional performance"[MeSH Terms] OR Physical Functional Performance[All Fields])) OR (physical[All Fields] AND performance*[All Fields])) OR ("physical examination"[MeSH Terms] OR (Physical[All Fields] AND Functional[All Fields])) OR (muscle[All Fields] AND weakness*[All Fields])) OR (muscular[All Fields] AND weakness*[All Fields])) OR ("polyneuropathies"[MeSH Terms] OR (Motor[All Fields] AND Polyneuropath*[All Fields])) OR (Acquired[All Fields] AND Polyneuropath*[All Fields])) OR (Critical Illness[All Fields] AND Polyneuropath*[All Fields])) OR ("muscle weakness"[MeSH Terms] OR [All Fields] OR (Muscle[All Fields] AND Weakness*[All Fields])) OR ((Muscular[All Fields] AND Weakness*[All Fields])) OR ("Muscular Diseases"[MeSH Terms] OR Muscular Disease[All Fields] OR Myopath*[All Fields] OR (Muscle[All Fields] AND Disorder*[All Fields])) OR (Myopathic[All Fields] AND Condition*[All Fields])) OR ("Paresis"[MeSH Terms] OR Pareses[All Fields] OR (Muscular[All Fields] AND Pares*[All Fields] OR (Muscle[All Fields] AND Pares*[All Fields])) OR (Acquired Weakness[All Fields] OR Acquired Debilitation[All Fields] OR ICU-AW[All Fields] OR Polyneuropath*[All Fields] OR Neuromuscular[All Fields] OR Quadriplegia[All Fields])) OR (CIM[Title/Abstract] OR CIP[Title/Abstract] OR CIPM[Title/Abstract] OR CIPNM[Title/Abstract] OR ICUAW[Title/Abstract] OR ICUAP[Title/Abstract] OR CINMA[Title/Abstract])

4. 1 AND 2 AND 3

EMBASE WZ (5 September 2020)

1. 'intensive care unit'/exp OR 'critical illness'/exp OR 'intensive care'/exp OR ((((intensive AND care AND unit* OR (critical AND illness*) OR critically) AND ill OR intensive) AND care OR surgical) AND intensive AND care)

2. 'diet therapy'/exp OR 'nutritional support'/exp OR 'enteric feeding'/exp OR 'parenteral nutrition'/exp OR (((((medical AND nutrition AND therapy OR (diet* AND modification*) OR artificial) AND feeding OR enteral) AND feeding OR force) AND feeding OR tube) AND feeding) OR (gastric AND feeding AND tube*) OR (parenteral AND feeding*) OR (intravenous AND feeding*)

3. 'physical performance'/exp OR 'physical examination'/exp OR 'polyneuropathy'/exp OR 'muscle weakness'/exp OR 'muscle disease'/exp OR 'paresis'/exp OR (((((functional AND status OR (functional AND performance*) OR physical) AND functional AND performance OR (physical AND performance*) OR (physical AND functional) OR (motor AND polyneuropath*) OR (acquired AND polyneuropath*) OR (critical AND illness AND polyneuropath*) OR (muscle AND weakness*) OR (muscular AND weakness*) OR muscular) AND disease OR myopath* OR (muscle AND disorder*) OR (myopathic AND condition*) OR pareses OR (muscular AND pares*) OR (muscle AND pares*) OR acquired) AND weakness OR acquired) AND debilitation) OR 'icu aw' OR polyneuropath* OR neuromuscular OR quadriplegia OR cim:ab,ti OR cip:ab,ti OR cipm:ab,ti OR cipnm:ab,ti OR icuaw:ab,ti OR icuap:ab,ti OR cinma:ab,ti

4. 1 AND 2 AND 3

Web of Science SR (4 September 2020)

1. TS=(intensive care units OR critical illness OR critical care OR) OR ALL=((Intensive Care AND Unit*) OR (critical AND illness*) OR Critically Ill OR Intensive Care OR Surgical Intensive Care)

2. TS=(nutrition therapy OR Diet Therapy OR nutritional support OR enteral nutrition OR Parenteral Nutrition OR) OR ALL=(Medical Nutrition Therapy OR (Diet* AND Modification*) OR Artificial Feeding OR Force Feeding OR Tube Feeding OR (Gastric Feeding AND Tube*) OR Enteral Feeding OR (Parenteral AND Feeding*) OR (Intravenous AND Feeding*))

3. TS=(physical functional performance OR physical examination OR polyneuropathies OR muscle weakness OR Muscular Diseases OR Paresis) OR ALL=((Functional AND Status) OR (functional AND performance*) OR Physical Functional Performance OR (physical AND performance*) OR (Physical AND Functional) OR (muscle AND weakness*) OR (muscular AND weakness*) OR (Motor AND Polyneuropath*) OR (Acquired AND Polyneuropath*) OR (Critical Illness AND Polyneuropath*)) OR ALL=(muscle weakness OR (Muscle AND Weakness*) OR (Muscular AND Weakness*) OR Muscular Disease OR Myopath* OR (Muscle AND Disorder*) OR (Myopathic AND Condition*) OR (Muscular AND Pares*) OR (Muscle AND Pares*) OR Acquired Weakness OR Acquired Debilitation) OR (TI=(ICU-AW OR Polyneuropath* OR Neuromuscular OR Quadriplegia OR CIM OR CIP OR CIPM OR CIPNM OR ICUAW OR ICUAP OR CINMA) OR AB=(ICU-AW OR Polyneuropath* OR Neuromuscular OR Quadriplegia OR CIM OR CIP OR CIPM OR CIPNM OR ICUAW OR ICUAP OR CINMA))

4. 1 AND 2 AND 3

CINAHL WZ (5 September 2020)

1. ( (MH "Intensive Care Units+") OR (MM "Critical Illness") OR (MH "Critical Care+") ) OR TX ( (Intensive Care AND Unit*) OR (critical AND illness*) OR Critically Ill OR Intensive Care OR Surgical Intensive Care )

2. ( (MH "Diet Therapy+") OR (MM "Nutrition Therapy (Iowa NIC)") OR (MH "Nutritional Support+") OR (MM "Enteral Nutrition") OR (MH "Parenteral Nutrition+") ) OR TX ( Medical Nutrition Therapy OR (Diet* AND Modification*) OR Artificial Feeding OR Enteral Feeding OR Force Feeding OR Tube Feeding OR (Gastric Feeding AND Tube*) OR (Parenteral AND Feeding*) OR (Intravenous AND Feeding*) )

3. ( (MM "Physical Performance") OR (MH "Physical Examination+") OR (MH "Polyneuropathies+") OR (MH "Muscle Weakness+") OR (MH "Muscular Diseases+") ) OR TX ( (Functional AND Status) OR (functional AND performance*) OR Physical Functional Performance OR (physical AND performance*) OR (Physical AND Functional) OR (muscle AND weakness*) OR (muscular AND weakness*) OR (Motor AND Polyneuropath*) OR (Acquired AND Polyneuropath*) OR (Critical Illness AND Polyneuropath*) OR (Muscle AND Weakness*) OR (Muscular AND Weakness*) OR Muscular Disease OR Myopath* OR (Muscle AND Disorder*) OR (Myopathic AND Condition*) OR Pareses OR (Muscular AND Pares*) OR (Muscle AND Pares*) OR Acquired Weakness OR Acquired Debilitation OR ICU-AW OR Polyneuropath* OR Neuromuscular OR Quadriplegia ) OR TI ( CIM OR CIP OR CIPM OR CIPNM OR ICUAW OR ICUAP OR CINMA ) OR AB ( CIM OR CIP OR CIPM OR CIPNM OR ICUAW OR ICUAP OR CINMA )

4. 1 AND 2 AND 3

Cochrane Library WZ (5 September 2020)

#1 MeSH descriptor: [Nutrition Therapy] explode all trees

#2 MeSH descriptor: [Diet Therapy] explode all trees

#3 MeSH descriptor: [Enteral Nutrition] explode all trees

#4 MeSH descriptor: [Nutritional Support] explode all trees

#5 MeSH descriptor: [Parenteral Nutrition] explode all trees

#6 Medical Nutrition Therapy OR (Diet* AND Modification*) OR Artificial Feeding OR Enteral Feeding OR Force Feeding OR Tube Feeding OR (Gastric Feeding AND Tube*) OR (Parenteral AND Feeding*) OR (Intravenous AND Feeding*)

#7 #1 OR #2 OR #3 OR #4 OR #5 OR #6

#8 MeSH descriptor: [Intensive Care Units] explode all trees

#9 MeSH descriptor: [Critical Illness] explode all trees

#10 MeSH descriptor: [Critical Care] explode all trees

#11 (Intensive Care AND Unit*) OR (critical AND illness*) OR Critically Ill OR Intensive Care OR Surgical Intensive Care

#12 #8 OR #9 OR #10 OR #11

#13 MeSH descriptor: [Polyneuropathies] explode all trees

#14 MeSH descriptor: [Muscle Weakness] explode all trees

#15 MeSH descriptor: [Muscular Diseases] explode all trees

#16 MeSH descriptor: [Paresis] explode all trees

#17 MeSH descriptor: [Physical Functional Performance] explode all trees

#18 MeSH descriptor: [Physical Examination] explode all trees

#19 (Functional AND Status) OR (functional AND performance*) OR Physical Functional Performance OR (physical AND performance*) OR (Physical AND Functional) OR (muscle AND weakness*) OR (muscular AND weakness*) OR (Motor AND Polyneuropath*) OR (Acquired AND Polyneuropath*) OR (Critical Illness AND Polyneuropath*) OR (Muscle AND Weakness*) OR (Muscular AND Weakness*) OR Muscular Disease OR Myopath* OR (Muscle AND Disorder*) OR (Myopathic AND Condition*) OR Pareses OR (Muscular AND Pares*) OR (Muscle AND Pares*) OR Acquired Weakness OR Acquired Debilitation OR ICU-AW OR Polyneuropath* OR Neuromuscular OR Quadriplegia

#20 (CIM OR CIP OR CIPM OR CIPNM OR ICUAW OR ICUAP OR CINMA):ti,ab,kw

#21 #13 OR #14 OR #15 OR #16 #17 OR #18 OR #19 OR #20

#22 #7 AND #12 AND #21
